# Supplementary material for: Survival and predictors of mortality among children co-infected with tuberculosis and human immunodeficiency virus at University of Gondar Comprehensive Specialized Hospital, Northwest Ethiopia. A retrospective follow-up study
Source: PLoS One. 2018 May 22;13(5):e0197145. doi: 10.1371/journal.pone.0197145 (PMC5963769; doi:10.1371/journal.pone.0197145)
Supplement: S1 File — (XLS) [file pone.0197145.s001.xls]

## Sheet: Sheet2
UniqueKey	ID	N102age of the child	N103Sex of the child	N104birthorder	N105Disclosurestatus1	N106childliveswith	N107MotherHIVstatus	N108Ageof the care giver	N109Sex	N110Relationshiptothechild	N111Occupation	N112Adress	N113familysize	N114HIVstatusofthecaregiver	N115IfpositiveishesheinHIVcare	N201WHOclinicalstage	N202CD4countpercent	N202CD4countpercent1	N202CD4	N203Hgblevel	N204Immunizationstatus	N205Weightatbaseline	N206Heightlengthatbaseline	N207Baselinenutritionalstatus	N208HistoryofOI	N303Eligibilitycriteria	N305Initialregimen	N306Wastheregimenchanged	N308Newregimen	N309Reasonforchange	N310Didthechildhadtreatmentfailu	N311Ifyeswhenwasthefailure	virologic	clinical	N313Secondlineregimen	N401Finalstatus	N402finalstatusdatefrombaseline	N403duringwhatperiodwasitdied	N315AdherenceofARTatbaseline	N316DidthechildintrepttheART	N317Forhowlong	N316Developmentalmilestone	N316Functionalstatus5years	N403FinalstatusdatefromTBdiagnos	NoOIprophylaxis	cotrimoxazole	Isoniazid	Fluconazole	others
1	1	126	Male	2	Fully disc	Parent	Unknown	42	Female	Siblings		Urban	5	Unknown	Missing	WHO stage	Advanced	295		13.4		25	130		HZ	CD4+ cells	AZT/3TC/EFV	No			No		No	No		Alive	49	ART	Good	No			Working	30	No	Yes	No	No	No
2	2	96	Male	3	Not record	Parent	Positive	28	Female	Mother	DAILY LABORER	Urban	5	Positive	Yes	WHO stage	Advanced	265		13.9	1	14	110		PTB	Both	AZT/3TC/NVP	Yes	AZT/3TC/EFV	TB	No		No	No		Transfer o	21	ART	Good	No			Working	21	No	Yes	No	No	No
3	3	54	Female	1	Not disclo	Parent	Unknown	32	Female	Mother		Urban	3	Unknown	Missing	WHO stage	Mild		23	12.4	1	11	100		NO	WHO stage	AZT/3TC/EFV	No			No		No	No		Transfer o	30	PRE ART	Good	No			Ambulatory	6	No	Yes	No	No	No
4	4	11	Male	1	Not disclo	Parent	Positive	20	Female	Mother		Rular	3	Positive	Yes	WHO stage	Sever		8.4	10.7		5	65	2	WS, EPTB,LUNG, PLEURA,	Both	ABC/3TC/EFV	No			No		No	No		Death	2	ART	Fair	No		Delay		2	No	Yes	No	No	No
5	5	108	Male	4	Fully disc	Parent	Unknown	49	Male	Father	FARMER	Rular	7	Negative	Missing	WHO stage	Non signif	502		13.1		25	139	2	EPTB	WHO stage	AZT/3TC/NVP	Yes	AZT/3TC/EFV	TB	No		No	No		Death	5	ART	Poor	Yes	80		Ambulatory	5	No	Yes	No	No	No
6	6	72	Female	2	Not disclo	Parent	Unknown	30	Female	Mother	housewife	Rular	5	Unknown	Missing	WHO stage	Advanced	209		9.1		14.5	106	2	TB	Both	D4T/3TC/EFV	Yes	AZT/3TC/EFV	stock out	No		No	No		Alive	36	ART	Good	No			Working	36	No	Yes	Yes	No	No
7	7	144	Female	2	Fully disc	Parent	Unknown	50	Male	Father	gov.employee	Urban	3	Unknown	Missing	WHO stage	Advanced	216		14.9	1	38	149		EPTB	WHO stage	TDF/3TC/EFV	No			No		No	No		Alive	4	ART	Good	No			Ambulatory	4	No	Yes	No	No	No
8	8	41	Male	2	Not disclo	Parent	Positive	27	Female	Mother	merchant	Urban	3	Positive	Yes	WHO stage	Sever		10.3	11	1	12	97		WS,PTB	Both	AZT/3TC/NVP	Yes	AZT/3TC/NVP	TB	No		No	No		Alive	19	ART	Good	No		Delay		19	No	Yes	No	No	No
9	9	108	Male	2	Not disclo	Parent	Positive	30	Female	Mother	housewife	Urban	5	Positive	Yes	WHO stage	Non signif	612		14.8	1	21	124	1	HZ	Both	AZT/3TC/EFV	No			No		No	No		Transfer o	29	ART	Good	No			Ambulatory	9	No	Yes	No	No	No
10	10	96	Male	4	Not disclo	Parent	Positive	39	Female	Mother	local birr seller	Urban	5	Positive	Yes	WHO stage	Mild	350		12.3	1	18	112	2	NO	WHO stage	AZT/3TC/EFV	No			No		No	No		Death	27	ART	Fair	No			Ambulatory	21	No	Yes	No	No	No
11	11	96	Female	1	Not disclo	Parent	Positive	30	Female	Mother	HOUSEWIFE	Rular	2	Positive	Yes	WHO stage	Non signif	518		8.3	1	21	124	2	WS	Both	AZT/3TC/EFV	Yes	ABC/3TC/EFV	Side effec	Yes	31	Yes	Yes	NO	Death	16	ART	Fair	Yes	300		Ambulatory	10	No	Yes	No	No	No
12	12	132	Female	3	Fully disc	Parent	Positive	38	Female	Father		Rular	7	Positive	Yes	WHO stage	Sever	2		10	2	18	124	2	SKIN LISION	CD4+ cells	D4T/3TC/EFV	Yes	AZT/3TC/EFV	stock out	No		No	No		Alive	46	ART	Good	No			Working	46	No	Yes	No	No	No
13	13	48	Male	1	Not disclo	Parent	Unknown	25	Female	Mother		Urban	2	Unknown	Missing	WHO stage	Sever		2.35	8		8	80	2	WS,EPTB,PNEU	Both	AZT/3TC/NVP	No			No		No	No		Death	2	ART	Poor	No		Delay		2	Yes	No	No	No	No
14	14	120	Male	2	Fully disc	Parent	Unknown	19	Male	Siblings	STUDENT	Rular	4	Unknown	Missing	WHO stage	Sever	81		11.4	2	26.5	139	2	PTB,DIAHR,FEVER	Both	ABC/3TC/EFV	No			Yes	15	No	No	NO	Alive	16	ART	Good	No			Ambulatory	16	No	Yes	No	No	No
15	15	120	Female	1	Not disclo	Gardian	Unknown	34	Male	others		Urban	4	Unknown	Missing	WHO stage	Advanced	200		13.7		17.5	127	2	EPTB,PNEU	Both	AZT/3TC/EFV	No			No		No	No		Alive	39	ART	Good	No			Ambulatory	38	No	Yes	Yes	No	No
16	16	168	Female	1	Fully disc	Parent	Unknown	40	Male	Father		Rular	3	Unknown	Missing	WHO stage	Advanced	222		11.7	2	43	145	2	MDRTB	WHO stage	TDF/3TC/EFV	No			No		No	No		Death	8	ART	Poor	Yes	40		Ambulatory	8	No	Yes	No	No	No
17	17	13	Male	1	Not disclo	Parent	Positive	24	Female	Mother	housewife	Urban	2	Positive	Yes	WHO stage	Sever		6.8	9.5	2	7	67	2	DSE EPTB	Both	D4T/3TC/KALETRA	No			No		No	No		Death	4	ART	Good	No		Delay		5	No	Yes	Yes	No	No
18	18	36	Male	1	Not disclo	Others	Unknown	62	Female	Step paren		Urban	3	Unknown	Missing	WHO stage	Non signif		30	13.3	2	7	80	2	EPTB,WS,ENCEPHA	WHO stage	D4T/3TC/KALETRA	No			No		No	No		Transfer o	3	ART	Good	No		Delay		3	No	Yes	No	No	No
19	19	132	Female	4	Fully disc	Parent	Unknown	52	Male	Father		Rular	5	Positive	Yes	WHO stage	Advanced	312		12.6	1	25	139	2	TB,PNEU	Both	AZT/3TC/EFV	No			No		No	No		Transfer o	1	ART	Good	No			Ambulatory	1	No	Yes	No	No	No
20	20	78	Female	1	Not disclo	Parent	Positive	30	Female	Mother		Rular	3	Positive	Yes	WHO stage	Advanced	209		7.4		13.5	98	2	DESMI EPTB,LUNG,PLEURA, DIAHR	Both	D4T/3TC/EFV	No			No		No	No		Loss to fo	5	ART	Fair	No			Ambulatory	5	No	Yes	No	No	No
21	21	31	Male	2	Not disclo	Parent	Positive	35	Female	Mother	Daily laborer	Urban	4	Positive	Yes	WHO stage	Advanced		21.3	10.6	1	7	75	2	DESMI EPTB,LUNG,LIVER,	Both	D4T/3TC/NVP	Yes	AZT/3TC/NVP	stock out	No		No	No		Alive	60	ART	Good	No		Delay		60	No	Yes	Yes	No	No
22	22	14	Male	1	Not disclo	Parent	Positive	25	Female	Mother		Urban	3	Positive	No	WHO stage	Sever		19	7.8	1	7	72	2	TB	Both	D4T/3TC/ABC	Yes	AZT/3TC/ABC	stock out	No		No	No		Alive	58	ART	Good	No		Delay		58	No	Yes	Yes	No	No
23	23	108	Male	1	Fully disc	Parent	Positive	32	Female	Mother		Urban	2	Positive	Yes	WHO stage	Advanced	206		10.7	1	21	135	2	DESMI EPTB LUNG,SPLEEN,LIVER, PNEU	Both	AZT/3TC/EFV	No			No		No	No		Alive	45	ART	Good	No			Ambulatory	45	No	Yes	Yes	No	No
24	24	72	Female	1	Fully disc	Parent	Positive	40	Male	Father	teacher	Rular	4	Positive	Yes	WHO stage	Non signif	625		12.4	1	15	112	2	TB	WHO stage	AZT/3TC/EFV	No			No		No	No		Alive	79	ART	Good	No			Ambulatory	66	No	Yes	Yes	No	No
25	25	96	Female	3	Not disclo	Parent	Positive	34	Male	Siblings		Urban	5	Unknown	Missing	WHO stage	Non signif	718		10.6	1	17	108		NO	WHO stage	AZT/3TC/NVP	Yes	AZT/3TC/EFV	TB	No		No	No		Alive	92	ART	Good	No			Working	25	No	Yes	Yes	No	No
26	26	96	Female	1	Fully disc	Parent	Unknown	57	Male	Father		Urban	9	Unknown	Missing	WHO stage	Advanced	293		12.9	2	21	125	1	PGL,PPE	Both	AZT/3TC/EFV	No			No		No	No		Alive	64	ART	Good	No			Ambulatory	62	No	Yes	Yes	No	No
27	27	48	Male	2	Parially d	Parent	Positive	27	Female	Mother		Urban	4	Positive	Yes	WHO stage	Sever		9	12.7	1	10	82	2	ANMIA,PTB,PPE,UN	Both	AZT/3TC/NVP	No			No		No	No		Alive	59	ART	Good	No		Delay		65	No	Yes	Yes	No	No
28	28	120	Male	2	Not disclo	Parent	Positive	26	Female	Mother		Urban	3	Positive	Yes	WHO stage	Mild	438		13.7	1	25	131		TB	CD4+ cells	AZT/3TC/NVP	Yes	AZT/3TC/EFV	Side effec	No		No	No		Alive	21	ART	Good	No			Working	21	No	Yes	Yes	No	No
29	29	84	Male	1	Parially d	Parent	Unknown	26	Female	Mother		Rular	2	Unknown	Missing	WHO stage	Sever	128		9.7	2	16	110	2	EPTB(MINGITIS)	Both	AZT/3TC/EFV	No			No		No	No		Death	3	ART	Fair	No			Bedriden	3	No	Yes	No	No	No
30	30	84	Male	1	Not disclo	Parent	Negative	27	Female	Mother		Urban	2	Negative	Missing	WHO stage	Sever	171		10.2	1	22.51	133	2	HZ,PTB	Both	D4T/3TC/NVP	No			No		No	No		Death	4	ART	Good	Yes	19		Ambulatory	4	No	No	No	No	No
31	31	108	Female	3	Parially d	Parent	Negative	42	Female	Mother		Rular	4	Negative	Missing	WHO stage	Advanced	214		11.3	1	17	125	2	WS,EPTB,LIVER,OMENTUM,INTESTINE	Both	AZT/3TC/NVP	No			No		No	No		Loss to fo	1	ART	Fair	No			Bedriden	1	No	Yes	No	No	No
32	32	36	Male	3	Not disclo	Parent	Unknown	32	Female	Siblings	MERCHANT	Urban	4	Unknown	Missing	WHO stage	Sever		14	10.4	2	13	95	2	TB,AGLAR CHLITIS	Both	D4T/3TC/NVP	Yes	AZT/3TC/NVP	stock out	No		No	No		Alive	51	ART	Good	No		Approprait		51	No	Yes	Yes	No	No
33	33	48	Female	1	Not disclo	Parent	Positive	34	Female	Mother	DAILY LABORER	Urban	2	Positive	Yes	WHO stage	Sever		4	8.8	2	10	86	2	WS,EPTB	Both	AZT/3TC/NVP	No			No		No	No		Loss to fo	5	ART	Good	No		Approprait		4	No	Yes	No	No	No
34	34	20	Male	1	Not disclo	Parent	Positive	26	Female	Mother	HOUSEWIFE	Urban	3	Positive	Yes	WHO stage	Advanced		20	12.1	1	8.5	76		ORAL TRUSH,PTB	Both	D4T/3TC/NVP	Yes	AZT/3TC/NVP	stock out	No		No	No		Alive	103	ART	Good	No		Approprait		103	No	Yes	Yes	No	No
35	35	65	Male	1	Fully disc	Parent	Positive	38	Female	Mother	merchant	Urban	4	Positive	Yes	WHO stage	Sever	133		9.1	1	12	88	2	PPE	CD4+ cells	AZT/3TC/NVP	Yes	D4T/3TC/NVP	Side effec	No		No	No		Alive	109	ART	Good	Yes	60		Working	63	No	Yes	Yes	No	No
36	36	36	Male	1	Fully disc	Parent	Unknown	46	Male	Father	driver	Urban	3	Unknown	Missing	WHO stage	Non signif	1150		13	1	11	87	2	DES EPTB TO LIVER,LUNG,MINGTIS	WHO stage	AZT/3TC/NVP	No			No		No	No		Alive	142	ART	Good	Yes	60	Approprait		142	No	Yes	Yes	No	No
37	37	132	Female	1	Fully disc	Others	Unknown	26	Male	Siblings		Rular	3	Unknown	Missing	WHO stage	Advanced	242		11.7		30.5	158		PTB	Both	AZT/3TC/NVP	No			No		No	No		Transfer o	17	ART	Good	No			Ambulatory	18	No	Yes	No	No	No
38	38	120	Female	1	Fully disc	Parent	Positive	27	Female	Mother		Urban	4	Positive	Yes	WHO stage	Advanced	208		11.9		18	121	2	EPTB LYPH NODE,MC,AC	Both	AZT/3TC/NVP	No			No		No	No		Alive	67	ART	Good	No			Ambulatory	67	No	Yes	Yes	No	No
39	39	96	Female	2	Fully disc	Parent	Positive	22	Female	Mother		Urban	4	Positive	Yes	WHO stage	Mild	357		10.7		10	100		EPTB,LIPHNODE	Both	AZT/3TC/NVP	Yes	TDF/3TC/EFV	Side effec	No		No	No		Alive	142	ART	Good	No			Ambulatory	142	No	Yes	Yes	No	No
40	40	89	Male	1	Parially d	Parent	Positive	27	Female	Mother	HOUSWIFE	Rular	3	Positive	Yes	WHO stage	Non signif	681		8.7		17	100	2	EPTB LYPHNODE, HZ	WHO stage	D4T/3TC/NVP	Yes	AZT/3TC/NVP	Side effec	No		No	No		Transfer o	65	ART	Good	No			Ambulatory	65	No	Yes	Yes	No	No
41	41	84	Female	1	Fully disc	Parent	Positive	24	Female	Mother		Urban	2	Positive	Yes	WHO stage	Advanced	291		12.9		14.5	100	2	PTB	Both	AZT/3TC/NVP	Yes	AZT/3TC/EFV	TB	No		No	No		Alive	106	ART	Good	No			Ambulatory	30	No	Yes	Yes	No	No
42	42	48	Male	2	Fully disc	Parent	Positive	38	Female	Mother		Urban	4	Positive	Yes	WHO stage	Sever	217	6.2	12.2		17	110		DIARH,FEVER, PTB	Both	D4T/3TC/NVP	Yes	D4T/3TC/EFV	TB	No		No	No		Alive	92	ART	Good	No		Approprait		90	No	Yes	Yes	No	No
43	43	72	Female	1	Fully disc	Parent	Positive	25	Female	Mother		Urban	2	Positive	Yes	WHO stage	Advanced	209		9.9		15	100	2	RED, PTB	WHO stage	D4T/3TC/NVP	Yes	AZT/3TC/NVP	stock out	No		No	No		Alive	91	ART	Good	No			Ambulatory	91	No	Yes	Yes	No	No
44	44	108	Male		Fully disc	Gardian	Unknown	20	Female	others		Urban	5	Unknown	Missing	WHO stage	Sever	89		12.3	1	20	131	2	PTB(2)	Both	D4T/3TC/NVP	Yes	D4T/3TC/EFV	TB	No		No	No		Death	35	ART	Good	No			Ambulatory	16	No	Yes	No	No	No
45	45	144	Female	2	Fully disc	Parent	Positive	34	Female	Mother	HOUSEWIFE	Urban	4	Positive	Yes	WHO stage	Sever	184		12.7	1	22.5	130	2	HZ,PTB	Both	D4T/3TC/NVP	No			No		No	No		Transfer o	10	ART	Good	No			Ambulatory	12	No	Yes	No	No	No
46	46	72	Male	1	Fully disc	Gardian	Unknown	45	Female	others		Urban	3	Unknown	Missing	WHO stage	Advanced	245		8	1	15	99	2	PCP,PTB,DIAH,RED	Both	D4T/3TC/NVP	Yes	D4T/3TC/EFV	TB	No		No	No		Death	91	ART	Good	No			Ambulatory	3	No	Yes	Yes	No	No
47	47	108	Male	1	Fully disc	Parent	Unknown	53	Female	Grand pare		Urban	3	Unknown	Missing	WHO stage	Mild	367		13		14	103		HZ,DIAH,PTB	WHO stage	AZT/3TC/NVP	Yes	D4T/3TC/NVP	Side effec	No		No	No		Alive	125	ART	Good	No			Ambulatory	130	No	Yes	Yes	No	No
48	48	48	Female	4	Not disclo	Parent	Positive	33	Female	Mother		Urban	5	Positive	Yes	WHO stage	Non signif		27	11.9		11	93	2	NO	CD4+ cells	D4T/3TC/NVP	Yes	AZT/3TC/EFV	TB	No		No	No		Alive	64	ART	Fair	Yes	120	Approprait		30	No	Yes	Yes	No	No
49	49	62	Male	1	Not disclo	Parent	Positive	25	Female	Mother	houswife	Urban	3	Positive	Yes	WHO stage	Sever	27		11.5		13.5	93	2	OT, RED, PTB	Both	D4T/3TC/EFV	No			No		No	No		Transfer o	24	ART	Good	No			Ambulatory	25	No	Yes	No	Yes	No
50	50	96	Male	6	Fully disc	Parent	Unknown	28	Female	Siblings		Rular	8	Unknown	Missing	WHO stage	Advanced	267		11	1	15	102	2	PTB	Both	D4T/3TC/EFV	Yes	AZT/3TC/EFV	TB	No		No	No		Loss to fo	52	ART	Good	No			Ambulatory	52	No	Yes	Yes	No	No
51	51	24	Male	5	Not disclo	Parent	Positive	37	Female	Mother		Urban	6	Positive	Yes	WHO stage	Sever	588	9.7	11		7.5	72	2	WS,RED,DESM EPTB, LUNG,LIVER	Both	AZT/3TC/NVP	No			Yes	30	Yes	Yes	NO	Death	56	ART	Good	Yes	21	Delay	Bedriden	9	No	Yes	Yes	No	No
60	52	96	Female	8	Not record	Parent	Positive	42	Female	Mother	HOUSEWIFE	Rular	10	Positive	Yes	WHO stage	Sever	88		11	1	17	103		RED, EPTB	Both	AZT/3TC/EFV	No			No		No	No		Transfer o	60	ART	Good	No			Ambulatory	60	No	Yes	No	No	No
52	53	82	Male	1	Fully disc	Parent	Positive	25	Female	Mother		Urban	3	Positive	Yes	WHO stage	Non signif	559		10.8	1	14.5	104	2	EMC,PTB	WHO stage	D4T/3TC/NVP	Yes	AZT/3TC/NVP	stock out	No		No	No		Alive	100	ART	Good	No			Ambulatory	106	No	Yes	No	No	No
53	54	39	Female	1	Not disclo	Parent	Positive	28	Female	Mother	HOUSEWIFE	Rular	2	Positive	Yes	WHO stage	Sever		14.8	12	1	8	75	2	PTB	Both	AZT/3TC/NVP	No			No		No	No		Alive	109	ART	Good	No		Approprait		109	No	Yes	No	No	No
54	55	43	Male	1	Fully disc	Parent	Positive	22	Female	Mother		Urban	3	Positive	Yes	WHO stage	Sever		7.9	10.9		10	82	2	ESO CANDI, PTB	WHO stage	AZT/3TC/NVP	No			Yes	74	Yes	No	NO	Treatment	77	ART	Good	No		Delay		80	No	Yes	Yes	No	No
55	56	72	Male		Not disclo	Parent	Unknown	50	Male	Grand pare		Urban	3	Unknown	Missing	WHO stage	Advanced	254		11.7		15	94	2	PTB	Both	AZT/3TC/EFV	No			No		No	No		Alive	127	ART	Good	No			Ambulatory	129	No	Yes	No	No	No
56	57	96	Female	1	Fully disc	Parent	Unknown	50	Female	Grand pare		Urban	3	Unknown	Missing	WHO stage	Advanced	246		11		12	95	2	PCP, HZ,OT,DIAH, PNEU,PTB	Both	AZT/3TC/NVP	Yes	D4T/3TC/NVP	Side effec	Yes	30	No	No		Treatment	133	ART	Fair	No			Ambulatory	133	No	Yes	Yes	No	No
57	58	58	Female	1	Fully disc	Parent	Unknown	41	Female	Grand pare		Urban	5	Unknown	Missing	WHO stage	Sever		13.8	13.6		15	96	2	PCP,OT,DIAH,PTB	Both	AZT/3TC/NVP	No			No		No	No		Alive	108	ART	Good	No		Approprait		108	No	Yes	No	No	No
58	59	84	Male	3	Fully disc	Parent	Positive	35	Female	Mother		Urban	5	Positive	Yes	WHO stage	Sever	196		11.9	1	17	122	2	PPE, PTB,HZ,DIAH	Both	AZT/3TC/NVP	No			No		No	No		Alive	108	ART	Good	No			Ambulatory	108	No	Yes	Yes	No	No
59	60	84	Female	2	Fully disc	Parent	Positive	35	Female	Mother		Urban	2	Positive	Yes	WHO stage	Advanced	332		12.5	1	14.5	103	2	HZ	CD4+ cells	D4T/3TC/NVP	Yes	D4T/3TC/EFV	TB	No		No	No		Alive	89	ART	Good	No			Ambulatory	90	No	Yes	Yes	No	No
61	61	84	Female	2	Fully disc	Orphage	Unknown	32	Female	others		Urban	5	Unknown	Missing	WHO stage	Non signif	1231		13.5	1	17	108		NO	WHO stage	AZT/3TC/EFV	No			No		No	No		Alive	93	ART	Good	No			Working	24	No	Yes	Yes	No	No
62	62	60	Female	1	Fully disc	Parent	Positive	28	Female	Mother	HOUSEWIFE	Urban	4	Positive	Yes	WHO stage	Advanced	666	15.7	12	2	11	102	2	PCP, PTB	Both	D4T/3TC/EFV	Yes	AZT/3TC/EFV	TB	No		No	No		Alive	84	ART	Good	Yes	14		Working	64	No	Yes	Yes	No	No
63	63	20	Female	4	Not disclo	Parent	Positive	30	Female	Mother		Urban	6	Positive	Yes	WHO stage	Advanced		19.3	8.2		9	78	2	DIAH	Both	AZT/3TC/EFV	Yes	AZT/3TC/EFV	TB	No		No	No		Alive	96	ART	Good	Yes	30	Delay		78	No	Yes	Yes	No	No
64	64	48	Male	1	Not disclo	Parent	Positive	38	Male	Father		Urban	2	Unknown	Missing	WHO stage	Sever		14.5	12.1		16	107		NO	CD4+ cells	D4T/3TC/NVP	Yes	TDF/3TC/EFV	TB	No		No	No		Alive	94	ART	Good	No		Approprait		36	No	Yes	Yes	No	No
65	65	132	Female	3	Fully disc	Parent	Positive	38	Male	Father		Urban	7	Unknown	Missing	WHO stage	Sever	2		10	1	18	124		PTB,	Both	D4T/3TC/EFV	Yes	AZT/3TC/EFV	stock out	No		No	No		Alive	46	ART	Good	No		Approprait		46	No	Yes	No	No	No
66	66	24	Female	1	Not disclo	Parent	Positive	22	Female	Mother		Urban	6	Positive	Yes	WHO stage	Advanced		17	10.9		8	75	2	PPE,PTB	Both	AZT/3TC/EFV	No			No		No	No		Alive	47	ART	Good	No		Approprait		47	No	Yes	No	No	No
67	67	144	Female	2	Fully disc	Parent	Unknown	18	Male	Siblings		Urban	7	Unknown	Missing	WHO stage	Sever	67		9.7		25.5	143		PTB	Both	AZT/3TC/EFV	No			No		No	No		Alive	63	ART	Fair	No		Approprait		63	No	Yes	Yes	No	No
68	68	108	Female	1	Fully disc	Parent	Unknown	50	Female	Grand pare		Urban	2	Unknown	Missing	WHO stage	Mild	388		15.6		20	120	2	NO	WHO stage	TDF/3TC/EFV	No			No		No	No		Alive	100	ART	Good	No			Working	33	No	Yes	Yes	No	No
69	69	96	Male	2	Not disclo	Parent	Unknown	61	Female	Grand pare		Urban	3	Unknown	Missing	WHO stage	Sever	79		11		12	95	2	WS,EPTB	Both	D4T/3TC/NVP	Yes	TDF/3TC/NVP	Side effec	No		No	No		Death	88	ART	Fair	No			Bedriden	4	No	No	No	No	No
70	70	60	Male		Fully disc	Parent	Positive	50	Male	Father		Urban	3	Positive	Yes	WHO stage	Non signif	946		12.3		14	99		DESM EPTB LUNG,LN,LIVER,, DIAH	WHO stage	AZT/3TC/NVP	Yes	D4T/3TC/NVP	Side effec	Yes	120	Yes	No	NO	Treatment	120	ART	Good	No			Bedriden	120	No	Yes	Yes	No	No
71	71	120	Female	2	Fully disc	Parent	Positive	40	Female	Mother		Urban	13	Positive	Yes	WHO stage	Sever	198		12		23.5	133	2	OT, PTB	WHO stage	AZT/3TC/NVP	Yes	AZT/3TC/EFV	TB	No		No	No		Alive	114	ART	Good	No			Working	78	No	Yes	Yes	No	No
72	72	72	Male	2	Parially d	Parent	Unknown	47	Male	Father		Urban	4	Unknown	Missing	WHO stage	Advanced	277		15.5		16.5	97		OT, DIAH,RED	Both	AZT/3TC/NVP	Yes	TDF/3TC/EFV	TB	No		No	No		Alive	123	ART	Good	No			Working	44	No	Yes	Yes	No	No
73	73	6	Male	2	Not disclo	Parent	Positive	32	Female	Mother		Rular	4	Positive	Yes	WHO stage	Sever		16	10.1	2	5.5	60	2	PNEU,DIAH, DESM EPTB,LUNG,PLEURA,LN,SPLEEN,LIVER	Both	D4T/3TC/KALETRA	Yes	AZT/3TC/KALTRA	stock out	No		No	No		Alive	36	ART	Good	No		Delay		36	No	Yes	No	No	No
74	74	93	Female	4	Fully disc	Parent	Positive	34	Female	Mother		Urban	6	Positive	Yes	WHO stage	Advanced	326		10.9	1	18	114	2	PTB	WHO stage	D4T/3TC/EFV	Yes	AZT/3TC/EFV	stock out	No		No	No		Alive	64	ART	Good	No			Ambulatory	66	No	Yes	Yes	No	No
75	75	72	Male	1	Not disclo	Parent	Unknown	50	Male	Grand pare		Urban	2	Unknown	Missing	WHO stage	Advanced	254		11.7		15	94	2	PTB	Both	AZT/3TC/EFV	No			No		No	No		Alive	116	ART	Good	No			Ambulatory	116	No	Yes	Yes	No	No
76	76	69	Female	1	Not record	Parent	Positive	35	Female	Mother		Urban	2	Positive	Yes	WHO stage	Advanced	207		13.3	1	15	105		PCP, OT, FEVER, RED, PTB	Both	D4T/3TC/NVP	Yes	AZT/3TC/NVP	Side effec	No		No	No		Death	81	ART	Good	No			Ambulatory	81	No	Yes	No	No	No
77	77	120	Male	1	Fully disc	Parent	Positive	40	Male	Father	EMPLOYEE	Rular	3	Positive	No	WHO stage	Sever	150		12.7		21	107	2	DIAH,PTB	Both	D4T/3TC/NVP	Yes	AZT/3TC/NVP	stock out	No		No	No		Alive	98	ART	Good	No			Ambulatory	98	No	Yes	No	No	No
78	78	84	Female	2	Fully disc	Parent	Unknown	35	Female	Mother		Urban	2	Unknown	Missing	WHO stage	Advanced	316		16	1	15	108		HZ,	WHO stage	D4T/3TC/NVP	Yes	AZT/3TC/EFV	TB	No		No	No		Alive	87	ART	Good	No			Ambulatory	57	No	Yes	Yes	No	No
79	79	54	Male	3	Fully disc	Parent	Positive	32	Female	Mother	HOUSEWIFE	Urban	5	Positive	Yes	WHO stage	Sever		8.5	13.2		14	97	2	EPTB	Both	AZT/3TC/EFV	No			No		No	No		Alive	76	ART	Good	No		Approprait		76	No	Yes	Yes	No	No
80	80	168	Female	1	Fully disc	Others	Positive	33	Male	Siblings		Urban	2	Unknown	Missing	WHO stage	Sever	28		8.2		34	158	2	PTB	Both	D4T/3TC/NVP	Yes	TDF/3TC/EFV	Side effec	Yes	49	No	No	NO	Death	9	ART	Good	No			Ambulatory	9	No	Yes	No	No	No
81	81	144	Male	2	Fully disc	Others	Unknown	28	Male	Siblings		Rular	3	Unknown	Missing	WHO stage	Non signif	777		9.5		25	133		EPTB	WHO stage	D4T/3TC/NVP	Yes	AZT/3TC/NVP	stock out	No		No	No		Alive	6	ART	Good	No			Ambulatory	6	No	Yes	No	No	No
82	82	48	Female	1	Fully disc	Parent	Positive	40	Female	Grand pare		Urban	3	Unknown	Missing	WHO stage	Mild		21	10.8		11.5	86		PTB	WHO stage	AZT/3TC/NVP	Yes	D4T/3TC/NVP	Side effec	No		No	No		Alive	126	ART	Good	No		Approprait		126	No	Yes	Yes	No	No
83	83	72	Male	2	Fully disc	Parent	Unknown	55	Female	Grand pare		Urban	7	Unknown	Missing	WHO stage	Advanced	215		10		15	105	2	EPTB	Both	D4T/3TC/NVP	Yes	D4T/3TC/EFV	TB	No		No	No		Alive	104	ART	Good	No			Ambulatory	71	No	Yes	Yes	No	No
84	84	96	Female	1	Fully disc	Parent	Unknown	50	Female	Grand pare		Urban	3	Unknown	Missing	WHO stage	Advanced	246		11	1	12	95	2	HZ, OT,DIAH, PCP,PNEU,RED, PTB	Both	AZT/3TC/NVP	Yes	TDF/3TC/NVP	Side effec	Yes	140	Yes	No	AZT/3TC/ATV	Treatment	140	ART	Good	No			Ambulatory	142	No	Yes	Yes	No	No
85	85	58	Female	1	Fully disc	Parent	Unknown	41	Female	Grand pare		Urban	2	Unknown	Missing	WHO stage	Sever		13.8	13.6		15	96		PTB	Both	AZT/3TC/NVP	No			No		No	No		Alive	111	ART	Good	No		Approprait		112	No	Yes	No	No	No
86	86	88	Male	3	Fully disc	Parent	Positive	30	Female	Mother		Urban	5	Positive	Yes	WHO stage	Sever	196		11.9		17	112		PPE,PTB	WHO stage	AZT/3TC/NVP	No			No		No	No		Alive	108	ART	Good	No			Ambulatory	110	No	Yes	Yes	No	No
87	87	84	Female	1	Fully disc	Parent	Positive	40	Male	Father		Urban	2	Positive	Yes	WHO stage	Sever	167		10		15	102	2	PEUN,RED, PTB	Both	AZT/3TC/EFV	Yes	TDF/3TC/EFV	Side effec	No		No	No		Alive	120	ART	Good	No			Ambulatory	120	No	Yes	Yes	No	No
88	88	90	Male	1	Fully disc	Parent	Positive	30	Female	Mother		Rular	3	Positive	Yes	WHO stage	Sever	18		14	1	17	101	2	DIAH,PTB	Both	AZT/3TC/NVP	No			Yes	108	Yes	No	NO	Treatment	108	ART	Good	No			Ambulatory	108	No	Yes	No	No	No
89	89	144	Female	1	Fully disc	Parent	Positive	28	Female	Mother	MERCHANT	Rular	4	Positive	Yes	WHO stage	Advanced	238		13.7		27	140	2	DIAH,PTB	Both	D4T/3TC/NVP	Yes	AZT/3TC/EFV	Side effec	No		No	No		Alive	44	ART	Good	No			Ambulatory	44	No	Yes	Yes	No	No
90	90	30	Male	2	Not disclo	Parent	Positive	27	Female	Mother	MERCHANT	Urban	4	Positive	Yes	WHO stage	Sever		15	9.5	1	8.8	77	2	OT,PTB	Both	AZT/3TC/EFV	No			No		No	No		Alive	43	ART	Good	No		Delay		43	No	Yes	No	No	No
91	91	72	Male		Not disclo	Parent	Unknown	40	Female	Mother		Urban	4	Unknown	Missing	WHO stage	Non signif	552		9.7		17	116		PTB	WHO stage	AZT/3TC/EFV	No			No		No	No		Alive	43	ART	Good	No			Working	43	No	Yes	No	No	No
92	92	120	Female		Not disclo	Gardian	Positive	18	Male	Siblings		Urban	7	Unknown	Missing	WHO stage	Sever	114		13.7		17	124		PTB	Both	AZT/3TC/EFV	No			No		No	No		Alive	40	ART	Good	No			Ambulatory	28	No	Yes	No	No	No
93	93	18	Male	1	Not disclo	Parent	Unknown	30	Female	Mother		Urban	2	Unknown	Missing	WHO stage	Sever		13	9.6		6	70	2	PTB	Both	D4T/3TC/KALETRA	No			No		No	No		Alive	32	ART	Good	No		Approprait		32	No	Yes	No	No	No
94	94	84	Female	6	Fully disc	Parent	Positive	35	Female	Mother		Urban	8	Positive	Yes	WHO stage	Non signif	518		12.1		15	117	2	PTB,CUTI	WHO stage	AZT/3TC/NVP	No			No		No	No		Alive	72	ART	Good	No			Ambulatory	72	No	Yes	No	No	No
95	95	96	Male		Parially d	Others	Unknown	58	Female	Grand pare		Urban	2	Unknown	Missing	WHO stage	Sever	107		12.6		20	124	1	PTB	Both	AZT/3TC/EFV	No			No		No	No		Alive	53	ART	Good	No			Working	53	No	Yes	No	No	No
96	96	168	Male	2	Fully disc	Parent	Positive	38	Female	Mother	MERCHANT	Urban	5	Positive	Yes	WHO stage	Sever	132		12.5	1	26	138	2	PTB	Both	AZT/3TC/EFV	No			Yes	48	No	No	NO	Treatment	48	ART	Good	No			Working	48	No	Yes	Yes	No	No
97	97	24	Male	1	Fully disc	Parent	Positive	27	Female	Mother		Rular	2	Positive	Yes	WHO stage	Sever		9.1	12		9	80	2	HZ,PTB	Both	AZT/3TC/KALETRA	No			No		No	No		Alive	54	ART	Good	No		Regression		54	No	Yes	Yes	No	No
98	98	168	Female	1	Fully disc	Parent	Unknown	23	Female	Mother		Urban	2	Unknown	Missing	WHO stage	Sever	131		12.6		23	130	2	PTB	Both	AZT/3TC/NVP	No			No		No	No		Alive	55	ART	Good	No			Working	55	No	Yes	No	No	No
99	99	30	Female	1	Not disclo	Parent	Unknown	19	Female	Mother		Urban	3	Unknown	Missing	WHO stage	Sever		16	10.3		9.5	85		PTB	Both	AZT/3TC/KALETRA	No			No		No	No		Alive	55	ART	Good	No		Approprait		55	No	Yes	Yes	No	No
100	100	156	Male	2	Fully disc	Parent	Positive	30	Female	Mother		Urban	5	Positive	No	WHO stage	Non signif	526		13.7		33	152		PTB	WHO stage	AZT/3TC/NVP	No			No		No	No		Alive	48	ART	Good	No			Bedriden	48	No	Yes	No	No	No
101	101	42	Female	4	Not disclo	Parent	Positive	38	Female	Mother		Rular	4	Positive	Yes	WHO stage	Advanced		19	12.4		10	87		PPE	CD4+ cells	AZT/3TC/EFV	No			No		No	No		Alive	54	ART	Good	No		Approprait		36	No	Yes	Yes	No	No
102	102	60	Male	1	Not disclo	Parent	Positive	35	Female	Mother		Urban	7	Positive	No	WHO stage	Non signif	636		12.9		14	107		PTB	WHO stage	AZT/3TC/NVP	No			No		No	No		Alive	61	ART	Good	No			Ambulatory	61	No	Yes	No	No	No
103	103	4	Female	2	Not disclo	Parent	Positive	25	Female	Mother	HOUSEWIFE	Urban	3	Positive	Yes	WHO stage	Sever		18	11.2		4	57		PTB	Both	AZT/3TC/EFV	No			No		No	No		Alive	42	ART	Good	No		Delay		42	No	Yes	Yes	No	No
104	104	81	Female		Not disclo	Parent	Positive	31	Female	Mother		Urban	5	Positive	Yes	WHO stage	Advanced	293		12		16.5	122		PTB	WHO stage	AZT/3TC/EFV	No			No		No	No		Alive	56	ART	Good	No			Ambulatory	56	No	Yes	Yes	No	No
106	105	96	Male	2	Parially d	Parent	Positive	28	Female	Mother		Rular	4	Positive	Yes	WHO stage	Sever	120		6.1	2	13	102		EPTB	Both	AZT/3TC/EFV	No			No		No	No		Alive	87	ART	Good	No			Bedriden	87	No	Yes	Yes	No	No
105	106	156	Female	2	Fully disc	Parent	Positive	38	Female	Mother		Rular	4	Positive	Yes	WHO stage	Mild	373		10.5		28	134		PTB	WHO stage	AZT/3TC/EFV	No			No		No	No		Loss to fo	31	ART	Good	Yes	455		Ambulatory	31	No	No	Yes	No	No
107	107	168	Female	2	Fully disc	Parent	Unknown	42	Male	Father		Urban	4	Unknown	Missing	WHO stage	Sever	148		13		28	138		PPE,PTB	Both	TDF/3TC/EFV	No			No		No	No		Alive	45	ART	Good	No			Working	45	No	Yes	No	No	No
108	108	84	Female	1	Not disclo	Parent	Positive	27	Female	Siblings		Rular	3	Unknown	Missing	WHO stage	Non signif	701		11		24	130		NO	Both	AZT/3TC/NVP	No			No		No	No		Transfer o	6	ART	Good	No			Working	6	No	Yes	No	No	No
109	109	72	Female	2	Parially d	Parent	Positive	30	Female	Mother		Rular	4	Positive	Yes	WHO stage	Mild	446		12.3		14	97		HZ, RED, PTB	Both	AZT/3TC/EFV	No			No		No	No		Loss to fo	15	ART	Good	No			Ambulatory	15	No	Yes	No	No	No
110	110	108	Female	3	Fully disc	Parent	Unknown	40	Male	Father		Rular	6	Unknown	Missing	WHO stage	Sever	198		10.5		17.5	111		PTB	Both	D4T/3TC/EFV	No			No		No	No		Death	1	ART	Fair	No			Bedriden	1	No	Yes	No	No	No
111	111	54	Female	1	Not disclo	Parent	Unknown	32	Female	Mother		Urban	3	Unknown	Missing	WHO stage	Mild		23	12.4		14	100		PTB	CD4+ cells	AZT/3TC/EFV	No			No		No	No		Transfer o	30	ART	Good	No		Approprait		6	No	Yes	No	No	No
112	112	30	Male	2	Not disclo	Gardian	Unknown	30	Male	others		Rular	4	Unknown	Missing	WHO stage	Mild		30	9.2	2	10	85	2	PTB	WHO stage	AZT/3TC/EFV	No			No		No	No		Alive	35	ART	Good	No		Delay		35	No	Yes	Yes	No	No
113	113	144	Female		Fully disc	Parent	Unknown	32	Female	Mother		Urban	2	Unknown	Missing	WHO stage	Non signif	702		14		32	142		PTB	WHO stage	TDF/3TC/EFV	No			No		No	No		Alive	28	ART	Good	No			Working	28	Yes	No	No	No	No
114	114	156	Male	1	Fully disc	Gardian	Unknown	50	Female	Grand pare		Urban	2	Unknown	Missing	WHO stage	Advanced	258		12		19	127		PCP, PPE, PTB	WHO stage	AZT/3TC/EFV	No			No		No	No		Alive	60	ART	Good	No			Ambulatory	60	No	Yes	Yes	No	No
115	115	108	Female	2	Not disclo	Parent	Unknown	30	Female	Mother		Rular	5	Unknown	Missing	WHO stage	Advanced	257		9		18	106	2	PTB	WHO stage	AZT/3TC/EFV	No			No		No	No		Alive	7	ART	Good	No			Ambulatory	7	No	Yes	No	No	No
116	116	72	Female	3	Not disclo	Parent	Unknown	36	Male	Father		Rular	5	Unknown	Missing	WHO stage	Non signif	700		12.7		15	113		PTB	WHO stage	AZT/3TC/EFV	No			No		No	No		Loss to fo	16	ART	Good	No			Ambulatory	6	No	Yes	No	No	No
117	117	108	Female	2	Fully disc	Parent	Unknown	50	Female	Grand pare		Rular	4	Unknown	Missing	WHO stage	Advanced	330		9.8		16	110	2	EPTB	WHO stage	D4T/3TC/EFV	Yes	AZT/3TC/EFV	stock out	No		No	No		Alive	57	ART	Good	No			Bedriden	57	No	Yes	No	No	No
118	118	4	Male	1	Not disclo	Parent	Positive	30	Female	Mother		Urban	4	Positive	Yes	WHO stage	Sever		24	7.6		4	53	2	PCP, PNEU,PTB	WHO stage	AZT/3TC/EFV	No			No		No	No		Alive	85	ART	Good	No		Delay		85	No	Yes	No	No	No
119	119	96	Male		Parially d	Parent	Unknown	50	Female	Grand pare		Urban	4	Unknown	Missing	WHO stage	Mild	455		10.1		18	108		PTB	Both	AZT/3TC/NVP	Yes	D4T/3TC/EFV	Side effec	Yes	96	No	No	NO	Treatment	144	ART	Good	No			Ambulatory	144	No	Yes	No	No	No
120	120	72	Female	1	Fully disc	Parent	Unknown	40	Male	Father		Rular	4	Unknown	Missing	WHO stage	Non signif	724		12.4		15	112		PTB	WHO stage	AZT/3TC/EFV	No			No		No	No		Alive	80	ART	Good	No			Ambulatory	55	No	Yes	Yes	No	No
121	121	96	Male	3	Parially d	Parent	Positive	27	Female	Mother		Urban	5	Positive	Yes	WHO stage	Advanced	275		13		12	100		PTB	Both	D4T/3TC/EFV	Yes	AZT/3TC/NVP	stock out	No		No	No		Alive	95	ART	Good	No			Working	52	No	Yes	No	No	No
122	122	60	Male		Fully disc	Parent	Positive	25	Female	Mother		Urban	6	Positive	Yes	WHO stage	Sever	40		12.2		12	92	2	PCP, RED, DIAH,FEVER, PTB	Both	AZT/3TC/NVP	No			No		No	No		Alive	119	ART	Good	No			Bedriden	119	No	Yes	Yes	No	No
123	123	120	Female	2	Fully disc	Parent	Positive	37	Female	Mother		Urban	4	Positive	No	WHO stage	Advanced	271		13.4		25	150		PTB	CD4+ cells	AZT/3TC/NVP	No			No		No	No		Alive	57	ART	Good	No			Working	57	No	Yes	No	No	No
124	124	30	Female	3	Fully disc	Parent	Negative	34	Male	Father		Urban	5	Negative	Missing	WHO stage	Advanced	222		8.1		14	106		PTB, PNEU	Both	D4T/3TC/EFV	Yes	AZT/3TC/EFV	TB	No		No	No		Alive	99	ART	Good	No			Ambulatory	99	No	Yes	Yes	No	No
125	125	48	Male	3	Not record	Others	Unknown	22	Female	Siblings		Urban	5	Unknown	Missing	WHO stage	Sever		13	9.7		9.5	88		WS, MARASMUS, EPTB	Both	AZT/3TC/EFV	No			No		No	No		Loss to fo	50	ART	Good	No		Approprait		50	No	Yes	No	No	No
126	126	132	Female	1	Fully disc	Parent	Positive	24	Female	Mother		Urban	1	Positive	No	WHO stage	Advanced	253		12.7		29	143		NO	WHO stage	AZT/3TC/EFV	No			No		No	No		Loss to fo	80	ART	Good	No			Working	66	No	Yes	Yes	No	No
127	127	96	Male	1	Fully disc	Parent	Positive	34	Female	Mother		Urban	2	Positive	No	WHO stage	Non signif	641		13.4		17	118	2	PTB	WHO stage	AZT/3TC/NVP	No			No		No	No		Alive	85	ART	Good	No			Ambulatory	85	No	Yes	Yes	No	No
128	128	73	Female	2	Parially d	Parent	Positive	30	Female	Mother		Urban	3	Positive	Yes	WHO stage	Non signif	743		14		16	115		EPTB LYMPHNIDINITIS	WHO stage	AZT/3TC/NVP	No			No		No	No		Alive	82	ART	Good	No			Working	82	No	Yes	Yes	No	No
129	129	25	Male	6	Parially d	Parent	Positive	35	Female	Mother		Urban	8	Positive	Yes	WHO stage	Sever		7.9	12.4		9	72		PTB	Both	D4T/3TC/NVP	Yes	AZT/3TC/NVP	Side effec	No		No	No		Alive	109	ART	Good	No		Approprait		109	No	No	Yes	No	No
130	130	39	Female	1	Not disclo	Parent	Positive	28	Female	Mother		Urban	2	Positive	Yes	WHO stage	Sever		14.8	10.8		8	75	2	PTB	Both	AZT/3TC/NVP	No			Yes	84	Yes	No	NO	Alive	96	ART	Good	No		Approprait		96	No	Yes	No	No	No
140	130	108	Male	2	Parially d	Others	Unknown	50	Male	Father		Urban	8	Positive	Yes	WHO stage	Sever	107		13	2	17	120	2	EPTB	CD4+ cells	AZT/3TC/EFV	No			No		No	No		Alive	77	ART	Good	No			Working	77	No	Yes	No	No	No
131	131	72	Female	1	Not disclo	Parent	Positive	27	Female	Mother		Urban	8	Positive	Yes	WHO stage	Non signif		40	12		5	56	2	OT, DIAH, PTB	WHO stage	AZT/3TC/NVP	Yes	AZT/3TC/ABC	TB	No		No	No		Alive	104	ART	Good	No		Delay		104	No	Yes	Yes	No	No
132	132	33	Female		Not disclo	Parent	Positive	34	Female	Mother		Urban	3	Positive	Yes	WHO stage	Sever	180		12		6	74	2	EPTB	Both	AZT/3TC/NVP	No			No		No	No		Alive	116	ART	Good	No		Delay		116	No	Yes	Yes	No	No
133	133	60	Female	1	Parially d	Parent	Positive	28	Female	Mother		Urban	3	Positive	Yes	WHO stage	Mild	454		10.9		12	89	2	PTB	WHO stage	AZT/3TC/NVP	No			Yes	84	Yes	No	NO	Loss to fo	84	ART	Good	No			Ambulatory	84	No	Yes	No	No	No
134	134	31	Male	1	Not disclo	Parent	Positive	22	Female	Mother		Urban	3	Positive	Yes	WHO stage	Advanced	563		10.9		10	81	2	EPTB, ESO CANDI	WHO stage	D4T/3TC/NVP	Yes	AZT/3TC/NVP	stock out	Yes	73	Yes	No	NO	Treatment	73	ART	Good	No		Approprait		73	No	Yes	Yes	No	No
135	135	82	Male	1	Parially d	Parent	Positive	26	Female	Mother		Urban	3	Positive	Yes	WHO stage	Non signif	559		10.8		14.5	104		PTB,MC	WHO stage	D4T/3TC/NVP	Yes	AZT/3TC/NVP	stock out	No		No	No		Loss to fo	96	ART	Good	No			Ambulatory	85	No	Yes	No	No	No
136	136	108	Male	1	Fully disc	Parent	Unknown	48	Female	Grand pare		Urban	4	Unknown	Missing	WHO stage	Advanced	227		11.8		18	110		PTB	WHO stage	D4T/3TC/NVP	Yes	AZT/3TC/NVP	stock out	Yes	60	Yes	No	NO	Treatment	111	ART	Good	Yes	915		Ambulatory	111	No	Yes	No	No	No
137	137	60	Male	1	Not disclo	Parent	Positive	28	Female	Mother		Rular	2	Positive	Yes	WHO stage	Non signif	978		12.1		11.5	98	2	NO	WHO stage	AZT/3TC/EFV	No			No		No	No		Alive	84	ART	Good	No			Ambulatory	35	No	Yes	No	No	No
138	138	132	Male	6	Parially d	Others	Positive	28	Female	Siblings		Urban	6	Negative	Missing	WHO stage	Mild	487		12.7		25	129		MC	Both	AZT/3TC/EFV	No			No		No	No		Loss to fo	74	ART	Good	No			Working	54	No	Yes	No	No	No
139	139	60	Male	1	Parially d	Parent	Positive	60	Female	Grand pare	HOUSEWIFE	Urban	3	Negative	Missing	WHO stage	Non signif	1313		13		11	87		PTB	WHO stage	AZT/3TC/NVP	No			No		No	No		Alive	137	ART	Good	No			Ambulatory	93	No	Yes	No	No	No
141	141	11	Female		Not record	Parent	Positive	24	Female	Mother		Urban	3	Positive	Yes	WHO stage	Sever	646		13.1	2	4.5	65		NO	WHO stage	D4T/3TC/NVP	Yes	D4T/3TC/ABC	TB	No		No	No		Alive	103	ART	Good	No		Delay		97	No	Yes	Yes	No	No
142	142	60	Female	3	Not record	Parent	Positive	27	Female	Mother	EMPLOYEE	Urban	4	Positive	Yes	WHO stage	Non signif	1176		12.5		10	84		TOXO	WHO stage	AZT/3TC/NVP	Yes	AZT/3TC/EFV	TB	No		No	No		Alive	134	ART	Good	No			Working	80	No	Yes	Yes	No	No
143	143	48	Female	6	Fully disc	Parent	Positive	40	Female	Mother		Urban	6	Positive	Yes	WHO stage	Sever	10		11.9	1	19	110		OT, EPTB	CD4+ cells	AZT/3TC/EFV	No			No		No	No		Alive	110	ART	Good	No		Approprait		110	No	Yes	No	No	No
144	144	108	Male	1	Fully disc	Parent	Positive	25	Female	Mother		Urban	3	Positive	Yes	WHO stage	Non signif	577		12.7		19.5	120		DIAH,HZ,PTB	WHO stage	AZT/3TC/NVP	No			No		No	No		Transfer o	108	ART	Good	No			Working	108	No	Yes	Yes	No	No
145	145	16	Male	1	Not record	Parent	Positive	29	Female	Mother	EMPLOYEE	Urban	1	Positive	Yes	WHO stage	Sever		17.7	9.2	1	9	71		DIAH, PTB	CD4+ cells	AZT/3TC/NVP	Yes	D4T/3TC/NVP	Side effec	No		No	No		Alive	84	ART	Good	No		Delay		84	No	Yes	No	No	No
146	146	108	Female	1	Fully disc	Gardian	Unknown	50	Female	Grand pare	HOUSEWIFE	Urban	3	Positive	No	WHO stage	Sever	150		13	1	16.5	109		HZ,DIAH, EPTB	CD4+ cells	AZT/3TC/NVP	No			No		No	No		Alive	108	ART	Good	No			Working	108	No	Yes	No	No	No
147	147	120	Female		Fully disc	Parent	Unknown	20	Female	Siblings		Urban	4	Unknown	Missing	WHO stage	Non signif	526		11.3		18	115		DIAH, HZ,PCP, PTB	Both	AZT/3TC/NVP	Yes	D4T/DDI/KALETRA	stock out	Yes	18	No	No	NO	Treatment	18	ART	Good	No			Ambulatory	18	No	Yes	No	No	No
148	148	12	Female		Fully disc	Parent	Positive	30	Female	Mother		Urban	4	Positive	Yes	WHO stage	Sever		18.2	9		6	66		PCP,DIAH, EPTB	Both	AZT/3TC/NVP	No			No		No	No		Death	37	ART	Fair	No		Delay		37	Yes	No	No	No	No
149	149	96	Male	4	Not record	Parent	Positive	40	Male	Father	FARMER	Rular	7	Positive	Yes	WHO stage	Sever	136		12.9	1	20	129		EPTB	Both	AZT/3TC/EFV	No			No		No	No		Loss to fo	75	ART	Good	No			Ambulatory	75	No	Yes	Yes	No	No
150	150	36	Male		Fully disc	Parent	Positive	27	Female	Mother		Urban	3	Positive	Yes	WHO stage	Sever		13	12.7	1	13	90	1	DIAH,PTB	CD4+ cells	AZT/3TC/NVP	No			No		No	No		Alive	110	ART	Good	No		Approprait		110	No	Yes	No	No	No
151	151	144	Male	2	Not record	Parent	Positive	52	Female	Mother		Urban	5	Positive	Yes	WHO stage	Advanced	201		13.7		23	125		EPTB	CD4+ cells	D4T/3TC/EFV	Yes	AZT/3TC/EFV	stock out	No		No	No		Alive	72	ART	Good	No			Working	72	No	Yes	No	No	No
152	152	96	Female	1	Fully disc	Parent	Positive	35	Female	Mother	HOUSEWIFE	Urban	3	Positive	Yes	WHO stage	Sever	116		11.5		18	115	1	PTB	CD4+ cells	AZT/3TC/NVP	No			No		No	No		Alive	72	ART	Good	No			Working	72	No	Yes	No	No	No
153	153	132	Female		Not record	Parent	Positive	36	Female	Mother	MERCHANT	Urban	3	Positive	Yes	WHO stage	Mild	387		11.1		27	139		PTB	WHO stage	AZT/3TC/NVP	No			No		No	No		Alive	36	ART	Good	No			Working	36	No	Yes	No	No	No
154	154	27	Male	1	Fully disc	Parent	Positive	31	Female	Mother	MERCHANT	Urban	5	Positive	Yes	WHO stage	Non signif		37.7	11.2		13.5	85		PTB	WHO stage	D4T/3TC/KALETRA	Yes	AZT/3TC/KALETRA	stock out	No		No	No		Alive	96	ART	Good	No		Approprait		96	No	Yes	No	No	No
155	155	84	Female		Not disclo	Parent	Unknown	25	Female	Mother		Rular	5	Unknown	Missing	WHO stage	Advanced	245		11.8		17	113		PTB	CD4+ cells	AZT/3TC/NVP	No			No		No	No		Loss to fo	36	ART	Good	No			Ambulatory	36	No	Yes	No	No	No
156	156	3	Male		Not disclo	Parent	Unknown	26	Female	Mother		Urban	7	Unknown	Missing	WHO stage	Mild		31	10.2		3.5	54		PCP, PTB	WHO stage	AZT/3TC/NVP	No			No		No	No		Death	48	ART	Poor	No		Delay		48	Yes	No	No	No	No
157	157	84	Female	2	Fully disc	Parent	Unknown	47	Male	Father	POLICE	Urban	5	Unknown	Missing	WHO stage	Sever	15		12.2		21.5	120		OT, PTB	Both	D4T/3TC/NVP	Yes	AZT/3TC/NVP	stock out	No		No	No		Loss to fo	84	ART	Good	No			Working	84	No	Yes	Yes	No	No
158	158	4	Female	1	Not record	Parent	Positive	19	Female	Mother	HOUSEWIFE	Urban	3	Positive	No	WHO stage	Sever	163		11.5		5	56	1	PTB	WHO stage	D4T/3TC/NVP	Yes	ABC/3TC/NVP	stock out	No		No	No		Alive	82	ART	Good	No		Delay		82	No	Yes	No	No	No
159	159	36	Male	3	Fully disc	Parent	Positive	25	Female	Mother	MERCHANT	Urban	4	Positive	Yes	WHO stage	Non signif		37.7	11.4	1	9	86	1	DIAH, PTB	WHO stage	AZT/3TC/NVP	No			No		No	No		Transfer o	82	ART	Good	No		Approprait		82	No	Yes	No	No	No
160	160	7	Female	2	Not record	Parent	Positive	25	Female	Mother	HOUSEWIFE	Urban	4	Positive	Yes	WHO stage	Sever		12.7	9.1		5.5	60		NO	CD4+ cells	D4T/3TC/NVP	Yes	D4T/3TC/ABC	TB	No		No	No		Death	72	ART	Good	No		Delay		66	No	Yes	No	No	No
161	161	4	Male	1	Not record	Parent	Positive	30	Female	Mother	MERCHANT	Urban	4	Positive	Yes	WHO stage	Sever		24.6	7.6		4	56	2	EPTB	Both	AZT/3TC/NVP	No			No		No	No		Death	72	ART	Good	No		Delay		72	No	Yes	No	No	No
162	162	84	Female	4	Fully disc	Parent	Unknown	37	Female	Mother	HOUSEWIFE	Urban	6	Unknown	Missing	WHO stage	Non signif	1599		14.3		22	106	1	RED	WHO stage	AZT/3TC/EFV	No			No		No	No		Alive	108	ART	Good	No		Approprait		84	No	Yes	No	No	No
163	163	36	Male	1	Not disclo	Parent	Unknown	48	Male	Father		Urban	4	Unknown	Missing	WHO stage	Sever		8	10.7		12	88	1	SEPSIS, EPTB	Both	AZT/3TC/NVP	No			No		No	No		Alive	63	ART	Good	No		Approprait		63	No	Yes	No	No	No
164	164	84	Male	2	Not record	Parent	Positive	25	Female	Mother		Urban	3	Positive	Yes	WHO stage	Sever	122		13		11.5	91	2	EPTB	Both	D4T/3TC/NVP	Yes	D4T/3TC/EFV	TB	No		No	No		Alive	60	ART	Good	No			Ambulatory	60	No	Yes	No	No	No
165	165	39	Female	3	Not record	Parent	Positive	21	Female	Mother	DAILY LABORER	Urban	5	Positive	Yes	WHO stage	Sever		14.7	11.8		11	89	1	PTB	CD4+ cells	AZT/3TC/NVP	No			No		No	No		Alive	81	ART	Good	No		Approprait		61	No	Yes	Yes	No	No
166	166	12	Female		Not disclo	Parent	Positive	30	Female	Mother	HOUSEWIFE	Urban	6	Positive	Yes	WHO stage	Sever		8.8	11.5		4.5	62		OT, PTB	CD4+ cells	AZT/3TC/ABC	Yes	AZT/3TC/NVP	stock out	No		No	No		Loss to fo	66	ART	Good	No		Delay		66	No	Yes	Yes	No	No
167	167	96	Female	3	Not disclo	Parent	Positive	30	Female	Mother	MERCHANT	Urban	3	Positive	Yes	WHO stage	Advanced	251		9.6		14	115	1	NO	WHO stage	D4T/3TC/NVP	Yes	D4T/3TC/EFV	TB	No		No	No		Alive	70	ART	Good	No			Working	52	No	Yes	No	No	No
168	168	168	Male	4	Fully disc	Parent	Positive	45	Female	Mother	STUDENT	Urban	4	Positive	Yes	WHO stage	Sever	18		6.5		50	176	2	EPTB	Both	TDF/3TC/EFV	No			No		No	No		Alive	18	ART	Good	No			Bedriden	18	No	Yes	Yes	No	No
169	169	28	Male		Not disclo	Parent	Positive	25	Female	Mother	HOUSEWIFE	Urban	6	Positive	Yes	WHO stage	Sever		8.3	10.1	2	9.5	82	2	PTB	WHO stage	D4T/3TC/NVP	Yes	AZT/3TC/NVP	stock out	Yes	84	No	Yes	NO	Treatment	84	ART	Good	No		Approprait		84	No	Yes	No	No	No
170	170	72	Male	2	Not disclo	Parent	Positive	22	Female	Mother	MERCHANT	Urban	7	Positive	Yes	WHO stage	Mild	458		10	2	14	103	1	EPTB	WHO stage	AZT/3TC/EFV	No			No		No	No		Alive	24	ART	Good	No			Ambulatory	24	No	Yes	Yes	No	No
171	171	144	Male		Not record	Parent	Positive	30	Female	Mother	HOUSEWIFE	Urban	4	Positive	Yes	WHO stage	Sever	122		9.1	1	24	121		PTB	Both	AZT/3TC/NVP	No			No		No	No		Alive	96	ART	Good	No			Working	96	No	Yes	Yes	No	No
172	172	52	Female		Not record	Parent	Positive	30	Female	Mother	HOUSEWIFE	Urban	4	Positive	Yes	WHO stage	Advanced		17	11.1		10	80	1	EPTB	WHO stage	AZT/3TC/EFV	No			No		No	No		Alive	120	ART	Good	No		Approprait		120	No	Yes	Yes	No	No
173	173	132	Male		Not record	Parent	Positive	38	Female	Mother	HOUSEWOFE	Urban	4	Positive	Yes	WHO stage	Sever	133		9.1		18	119		PTB	Both	AZT/3TC/NVP	No			No		No	No		Alive	78	ART	Good	No			Working	78	No	Yes	Yes	No	No
174	174	132	Female		Not record	Parent	Positive	30	Female	Mother	HOUSEWIFE	Urban	4	Positive	Yes	WHO stage	Advanced	313		12.5		29	142	2	PTB	WHO stage	AZT/3TC/NVP	No			No		No	No		Alive	24	ART	Good	No			Ambulatory	24	No	Yes	No	No	No
175	175	144	Male	2	Not disclo	Parent	Positive	30	Female	Mother	HOUSEWIFE	Urban	4	Positive	Yes	WHO stage	Advanced	303		11.2	1	31	141	2	PTB	WHO stage	D4T/3TC/NVP	Yes	AZT/3TC/NVP	stock out	No		No	No		Loss to fo	78	ART	Good	No			Working	78	No	Yes	No	No	No
176	176	120	Female	2	Not disclo	Parent	Positive	37	Female	Mother		Urban	4	Positive	Yes	WHO stage	Non signif	527		13.8		31	131	1	PTB	Both	AZT/3TC/NVP	No			No		No	No		Alive	48	ART	Good	No			Working	48	No	Yes	No	No	No
177	177	54	Male	3	Not disclo	Parent	Positive	32	Female	Mother	HOUSEWIFE	Urban	5	Positive	Yes	WHO stage	Sever	156		11.5		14	97		EPTB	Both	AZT/3TC/EFV	No			No		No	No		Alive	72	ART	Good	No		Approprait		72	No	Yes	No	No	No
178	178	84	Male	2	Fully disc	Parent	Positive	32	Female	Mother	HOUSEWIFE	Urban	11	Positive	Yes	WHO stage	Sever	97		14	2	18	110		HZ, PTB	CD4+ cells	D4T/3TC/NVP	Yes	AZT/3TC/EFV	stock out	No		No	No		Death	62	ART	Good	No			Working	56	No	Yes	No	No	No
179	179	96	Female	2	Fully disc	Parent	Positive	22	Female	Mother		Urban	3	Positive	Yes	WHO stage	Sever	24		9.3	2	16.4	109		TOXO,PTB	CD4+ cells	AZT/3TC/EFV	Yes	TDF/3TC/EFV	Side effec	Yes	60	No	No	NO	Death	72	ART	Good	No			Ambulatory	60	No	Yes	No	No	No
180	180	33	Male	3	Parially d	Parent	Positive	32	Female	Mother	HOUSEWIFE	Rular	3	Positive	Yes	WHO stage	Mild		26.6	12.3	2	13	84		DIAH,	WHO stage	AZT/3TC/NVP	No			No		No	No		Alive	103	ART	Good	No		Approprait	Ambulatory	24	No	Yes	No	No	No
181	181	47	Female	5	Fully disc	Parent	Positive	34	Female	Mother	HOUSEWIFE	Urban	5	Positive	Yes	WHO stage	Mild		20	10.5		14	99		NO	CD4+ cells	AZT/3TC/NVP	Yes	AZT/3TC/EFV	TB	No		No	No		Alive	100	ART	Good	No		Approprait		18	No	Yes	Yes	No	No
182	182	96	Female	2	Parially d	Parent	Positive	25	Female	Mother	HOUSEWIFE	Urban	4	Positive	Yes	WHO stage	Mild	357		10.7	2	14	114		TOXO, EPTB	WHO stage	AZT/3TC/NVP	Yes	TDF/3TC/NVP	Side effec	No		No	No		Death	62	ART	Good	No			Ambulatory	62	No	No	No	No	No
183	183	120	Male	5	Fully disc	Parent	Unknown	17	Male	others		Urban	7	Unknown	Missing	WHO stage	Sever	52		10	1	15	107		RED, EPTB	Both	AZT/3TC/NVP	Yes	AZT/3TC/EFV	TB	Yes	48	Yes	No	ABC/3TC/KALETRA	Treatment	48	ART	Poor	No			Ambulatory	24	No	Yes	No	No	No
184	184	5	Female	2	Not record	Parent	Positive	28	Female	Mother		Urban	4	Positive	Yes	WHO stage	Sever		24	12.9		5.5	67		EPTB	CD4+ cells	AZT/3TC/NVP	No			No		No	No		Loss to fo	47	ART	Good	No		Delay		47	No	No	No	No	No
185	185	33	Male	3	Not record	Parent	Positive	35	Female	Mother		Urban	4	Positive	Yes	WHO stage	Mild	698		8.2	1	8	77		DIAH, PTB	Both	D4T/3TC/NVP	No			Yes	20	No	No	NO	Transfer o	20	ART	Poor	No		Delay		20	No	Yes	No	No	No
186	186	24	Male	1	Not disclo	Parent	Positive	30	Female	Mother	HOUSEWIFE	Urban	3	Positive	Yes	WHO stage	Sever		17	7.5	1	5.2	73		DIAH, EPTB	WHO stage	AZT/3TC/NVP	No			No		No	No		Alive	101	ART	Good	No		Delay		101	No	Yes	Yes	No	No
187	187	84	Male	3	Fully disc	Parent	Unknown	35	Male	Father		Urban	5	Negative	No	WHO stage	Sever	89		12		12	95		PCP, DIAH, PTB	Both	AZT/3TC/NVP	Yes	D4T/3TC/NVP	Side effec	Yes	104	Yes	No	TDF/3TC/ATV	Treatment	104	ART	Good	No			Working	104	No	Yes	Yes	No	No
188	188	48	Male	4	Parially d	Parent	Positive	26	Female	Mother		Urban	6	Positive	Yes	WHO stage	Sever		9	11.7		11	85		DIAH, PTB	WHO stage	AZT/3TC/NVP	Yes	AZT/3TC/ATV	Treatment	Yes	36	Yes	No	AZT/3TC/ATV	Treatment	36	ART	Good	No		Approprait		36	No	Yes	No	No	No
189	189	120	Male	2	Not disclo	Parent	Positive	36	Female	Mother		Rular	4	Positive	Yes	WHO stage	Mild	385		10		22	124	2	NO	WHO stage	D4T/3TC/NVP	Yes	AZT/3TC/ATV	Treatment	Yes	100	Yes	No	AZT/3TC/ATV	Treatment	100	ART	Good	Yes	90		Ambulatory	100	No	Yes	No	No	No
190	190	132	Male	1	Not record	Parent	Positive	28	Female	Mother	MERCHANT	Urban	3	Positive	Yes	WHO stage	Sever	177		13.1	1	15	106	1	NO	CD4+ cells	AZT/3TC/NVP	Yes	AZT/3TC/EFV	TB	No		No	No		Alive	72	ART	Good	No			Working	62	No	Yes	No	No	No
191	191	60	Male	1	Not record	Others	Unknown	35	Female	Siblings		Urban	5	Unknown	Missing	WHO stage	Non signif	1057		13		17.5	110		NO	WHO stage	AZT/3TC/EFV	No			No		No	No		Alive	67	ART	Good	No			Ambulatory	24	No	Yes	No	No	No
192	192	24	Male	2	Not record	Parent	Positive	28	Female	Mother		Urban	2	Unknown	Missing	WHO stage	Sever		10	12	1	8.5	82		PTB	Both	AZT/3TC/NVP	No			No		No	No		Alive	60	ART	Good	No		Approprait		60	No	Yes	No	No	No
193	193	108	Female	1	Not record	Parent	Positive	24	Female	Mother	TEACHER	Rular	4	Positive	Yes	WHO stage	Mild	474		13.5	1	27	133		PTB	WHO stage	AZT/3TC/NVP	No			No		No	No		Alive	48	ART	Good	No			Working	48	No	Yes	No	No	No
194	194	132	Male	2	Parially d	Parent	Positive	26	Male	Father		Urban	4	Positive	Yes	WHO stage	Sever	124		9.8		16	108		NO	CD4+ cells	AZT/3TC/NVP	Yes	TDF/3TC/EFV	TB	No		No	No		Alive	120	ART	Good	No			Ambulatory	102	No	Yes	No	No	No
195	195	102	Female	2	Fully disc	Parent	Positive	38	Female	Mother		Urban	3	Positive	Yes	WHO stage	Sever	105		9.8	1	16.5	117	2	PTB, OT	Both	D4T/3TC/NVP	Yes	AZT/3TC/EFV	stock out	No		No	No		Loss to fo	84	ART	Good	No			Ambulatory	72	No	Yes	No	No	No
196	196	8	Female	2	Not disclo	Parent	Positive	33	Female	Mother		Urban	5	Positive	Yes	WHO stage	Sever		13.8	11.5	1	6	64	2	PCP, OT, DIAH, EPTB	Both	AZT/3TC/NVP	No			No		No	No		Death	96	ART	Good	No		Delay		96	No	Yes	Yes	No	No
197	197	84	Male	1	Fully disc	Parent	Unknown	38	Male	Father	MERCHANT	Urban	2	Unknown	Missing	WHO stage	Non signif	1024		12.5	1	23	123		PCP, DIAH	WHO stage	TDF/3TC/NVP	No			No		No	No		Alive	102	ART	Good	No			Working	36	No	Yes	No	No	No
198	198	108	Female	3	Fully disc	Gardian	Positive	24	Female	Siblings		Urban	3	Unknown	Missing	WHO stage	Sever	180		12.5	1	25	130		PTB, DIAH	Both	D4T/3TC/NVP	Yes	AZT/3TC/NVP	stock out	No		No	No		Alive	84	ART	Good	No			Working	84	No	Yes	No	No	No
199	199	20	Male	1	Not record	Parent	Positive	26	Female	Mother	HOUSEWIFE	Urban	3	Positive	Yes	WHO stage	Advanced	512		12.1	1	8.5	76		DIAH, OT	WHO stage	D4T/3TC/NVP	Yes	AZT/3TC/NVP	stock out	No		No	No		Alive	95	ART	Good	No		Approprait		84	No	Yes	No	No	No
200	200	168	Female	2	Not record	Others	Unknown	21	Female	Siblings		Urban	3	Unknown	Missing	WHO stage	Mild	460		13	2	30	152		EPTB	CD4+ cells	TDF/3TC/EFV	No			No		No	No		Alive	60	ART	Good	No			Ambulatory	60	No	No	No	No	No
201	201	24	Male		Not disclo	Parent	Positive	30	Female	Mother	HOUSEWIFE	Rular	5	Positive	Yes	WHO stage	Advanced		23	13.3	1	7	78		NO	WHO stage	AZT/3TC/KALETRA	No			No		No	No		Alive	48	PRE ART	Good	No		Approprait		36	No	Yes	No	No	No
202	202	31	Female		Not disclo	Parent	Positive	35	Female	Mother		Urban	4	Positive	Yes	WHO stage	Advanced		21	9.9		9	85		PTB, DIAH	WHO stage	D4T/3TC/NVP	Yes	AZT/3TC/NVP	stock out	No		No	No		Alive	54	ART	Good	No		Approprait		54	No	Yes	Yes	No	No
203	203	24	Male		Not disclo	Parent	Positive	25	Female	Mother	EMPLOYEE	Urban	2	Positive	Yes	WHO stage	Sever		11	10.2		9	80		OT, EPTB	Not record	ABC/3TC/EFV	Yes	5F	stock out	Yes	27	Yes	No	AZT/3TC/ATV	Treatment	27	ART	Good	No		Regression		27	No	Yes	No	No	No
204	204	48	Male		Not disclo	Parent	Positive	27	Female	Mother		Urban	4	Positive	Yes	WHO stage	Sever		9	10.9		10	90		EPTB	Both	AZT/3TC/NVP	No			No		No	No		Alive	66	ART	Good	No		Approprait		66	No	Yes	No	No	No
205	205	48	Male		Not record	Parent	Positive	22	Female	Mother	MERCHANT	Urban	7	Positive	No	WHO stage	Advanced		16	10		14	103		EPTB	WHO stage	AZT/3TC/EFV	No			No		No	No		Alive	62	ART	Good	No		Approprait		62	No	Yes	No	No	No
206	206	108	Male		Not record	Parent	Positive	49	Male	Father		Urban	5	Unknown	Missing	WHO stage	Non signif	502		13.1		23	125		EPTB	Both	AZT/3TC/NVP	No			No		No	No		Transfer o	21	ART	Good	No			Working	21	No	Yes	No	No	No
207	207	33	Male		Not disclo	Parent	Unknown	40	Male	Father	DAILY LABORER	Urban	4	Unknown	Missing	WHO stage	Advanced	686		7.9		8.5	79		PTB, DIAH	Both	AZT/3TC/NVP	No			No		No	No		Alive	35	ART	Good	No		Approprait		35	No	Yes	No	No	No
208	208	60	Male		Parially d	Parent	Positive	45	Female	Mother		Urban	4	Positive	Yes	WHO stage	Advanced	244		13.7		12.5	88		EPTB	WHO stage	AZT/3TC/NVP	No			No		No	No		Alive	60	ART	Good	No			Ambulatory	60	No	Yes	No	No	No
209	209	120	Female		Not record	Parent	Unknown	40	Female	Grand pare		Urban	3	Unknown	Missing	WHO stage	Sever	114		13.7		17	124		PTB	Both	AZT/3TC/EFV	No			No		No	No		Alive	36	ART	Good	No			Ambulatory	36	No	Yes	No	No	No
210	210	96	Male		Fully disc	Parent	Positive	38	Female	Mother	DAILY LABORER	Urban	3	Positive	Yes	WHO stage	Non signif	657		13.6		24.5	131		PTB	WHO stage	AZT/3TC/NVP	No			No		No	No		Alive	67	ART	Good	No			Working	67	No	No	No	No	No
211	211	120	Male		Fully disc	Parent	Positive	28	Female	Mother	HOUSEWIFE	Urban	3	Positive	Yes	WHO stage	Mild	438		12.6		25	131		PTB	Not record	AZT/3TC/NVP	No			No		No	No		Alive	37	ART	Good	No			Working	37	No	No	No	No	No
212	212	96	Male		Fully disc	Parent	Unknown	58	Female	Grand pare		Urban	3	Unknown	Missing	WHO stage	Sever	10		14		20	127		PTB	CD4+ cells	AZT/3TC/EFV	No			No		No	No		Transfer o	47	ART	Good	No			Working	47	No	No	No	No	No
213	213	84	Male		Not record	Parent	Positive	27	Female	Mother	HOUSEWIFE	Rular	4	Positive	Yes	WHO stage	Non signif	945		13.4		16	105		PTB	WHO stage	AZT/3TC/EFV	No			No		No	No		Transfer o	1	ART	Good	No			Working	1	No	Yes	No	No	No
214	214	168	Female		Fully disc	Others	Unknown	20	Female	Siblings	STUDENT	Urban	2	Unknown	Missing	WHO stage	Advanced	244		11		22	128		PTB	Both	AZT/3TC/NVP	No			No		No	No		Loss to fo	32	ART	Good	Yes	90		Working	32	No	Yes	No	No	No
215	215	36	Male		Not disclo	Parent	Positive	27	Female	Mother	MERCHANT	Urban	2	Positive	Yes	WHO stage	Sever		10.3	12.2		12	97		PTB, WS	Both	AZT/3TC/NVP	No			No		No	No		Alive	52	ART	Good	No		Delay		52	No	Yes	No	No	No
216	216	36	Male		Not disclo	Parent	Unknown	30	Male	Father	FRAMER	Urban	2	Unknown	Missing	WHO stage	Mild		20	13.9		8	85		PTB, DIAH	WHO stage	D4T/3TC/KALETRA	No			No		No	No		Transfer o	35	ART	Good	No		Delay		35	Yes	No	No	No	No
217	217	60	Male		Parially d	Parent	Positive	40	Female	Mother	HOUSEWIFE	Urban	5	Positive	No	WHO stage	Non signif	537		14		16	108		PTB	WHO stage	AZT/3TC/EFV	No			No		No	No		Alive	51	ART	Good	Yes	125		Working	51	Yes	No	No	No	No
218	218	30	Female		Not disclo	Parent	Positive	28	Female	Mother	NGO EMPLOYEE	Urban	6	Positive	Yes	WHO stage	Sever		13	14		14.5	86		PTB	CD4+ cells	AZT/3TC/NVP	No			No		No	No		Alive	40	ART	Good	Yes	90	Delay		46	Yes	No	No	No	No
219	219	24	Female		Not disclo	Parent	Positive	25	Female	Mother		Rular	3	Positive	Yes	WHO stage	Sever		9	12		10	77		PTB	CD4+ cells	AZT/3TC/KALETRA	No			No		No	No		Death	1	ART	Poor	No		Delay		1	No	No	No	No	No
220	220	84	Female		Parially d	Others	Unknown	30	Female	Siblings		Rular	3	Unknown	Missing	WHO stage	Mild	470		13		14.5	106		PTB	WHO stage	D4T/3TC/EFV	Yes	AZT/3TC/EFV	stock out	No		No	No		Alive	36	ART	Good	No			Ambulatory	36	No	Yes	No	No	No
221	221	72	Male		Parially d	Parent	Unknown	40	Female	Father	GOVERMNET EMPLOYEE	Urban	4	Unknown	Missing	WHO stage	Non signif	552		11.4		17	116		PTB	WHO stage	AZT/3TC/NVP	No			No		No	No		Alive	70	ART	Good	No			Ambulatory	70	No	No	No	No	No
222	222	144	Female		Fully disc	Parent	Positive	40	Female	Mother	MERCHANT	Urban	4	Unknown	Missing	WHO stage	Advanced	222		11		40	150		PTB	CD4+ cells	TDF/3TC/EFV	No			No		No	No		Loss to fo	20	ART	Good	No			Ambulatory	20	No	No	No	No	No
223	223	19	Male		Not disclo	Parent	Positive	24	Female	Mother	HOUSEWIFE	Urban	3	Positive	Yes	WHO stage	Sever		6.8	9.5		7	67		PTB, DIAH	Both	D4T/3TC/KALETRA	No			No		No	No		Loss to fo	6	ART	Good	No		Delay		6	No	Yes	No	No	No
224	224	108	Male		Not record	Parent	Positive	29	Female	Mother	MERCHANT	Urban	4	Positive	Yes	WHO stage	Advanced	307		14.3		33	146		PTB	WHO stage	AZT/3TC/EFV	No			No		No	No		Alive	83	ART	Good	No			Working	83	No	Yes	No	No	No
225	225	96	Male		Not record	Parent	Positive	28	Female	Mother		Urban	5	Positive	Yes	WHO stage	Advanced	263		13.1		18.5	118		PTB	Both	AZT/3TC/NVP	No			No		No	No		Transfer o	40	ART	Good	No			Working	40	No	Yes	No	No	No
226	226	60	Male		Parially d	Parent	Positive	28	Female	Mother	GOVERNMENT EMPLOYEE	Urban	3	Positive	Yes	WHO stage	Advanced	350		12.1		22	125		PTB	WHO stage	AZT/3TC/EFV	No			No		No	No		Alive	12	ART	Good	No			Ambulatory	12	No	No	Yes	No	No
227	227	60	Female		Parially d	Parent	Unknown	32	Male	Father	DAILY LABORER	Urban	5	Unknown	Missing	WHO stage	Sever	11		7.8		11	103		DIAH, PTB	Both	AZT/3TC/NVP	No			No		No	No		Alive	1	ART	Good	No			Working	1	No	Yes	No	No	No
228	228	168	Female		Fully disc	Parent	Positive	26	Female	Mother	NGO EMPLOYEE	Urban	3	Positive	No	WHO stage	Sever	44		13		23	133		EPTB, PNEU	Both	AZT/3TC/NVP	No			No		No	No		Alive	23	ART	Good	No			Working	23	No	Yes	No	No	No
229	229	144	Female		Fully disc	Parent	Unknown	35	Female	Father		Urban	4	Unknown	Missing	WHO stage	Sever	145		13		26	132		PTB, PNEU	WHO stage	AZT/3TC/EFV	No			No		No	No		Transfer o	21	ART	Good	Yes	25		Ambulatory	21	No	Yes	No	No	No
230	230	12	Female		Not disclo	Parent	Positive	25	Female	Mother		Urban	3	Positive	Yes	WHO stage	Sever		19	11.5		8	72		PTB	CD4+ cells	D4T/3TC/ABC	Yes	AZT/3TC/ABC	stock out	No		No	No		Alive	62	ART	Good	No		Approprait		62	No	Yes	No	No	No
231	231	12	Male	1	Parially d	Parent	Positive	25	Female	Mother	TEACHER	Urban	3	Positive	Yes	WHO stage	Sever		13.4	9.8		9	74		PCP, OT, PNEU, EPTB	Both	D4T/3TC/NVP	No			No		No	No		Death	2	ART	Poor	No		Delay		2	No	No	No	No	No
232	232	84	Male	6	Fully disc	Parent	Negative	40	Female	Mother	HOUSEWIFE	Urban	8	Negative	Missing	WHO stage	Advanced	327		12.1		18	106	1	RED, PTB	WHO stage	AZT/3TC/NVP	No			No		No	No		Alive	100	ART	Good	No			Working	94	No	Yes	No	No	No
233	233	84	Female	2	Fully disc	Parent	Positive	35	Female	Mother	MERCHANT	Urban	4	Positive	Yes	WHO stage	Non signif	1203		15		15	107		PTB	Both	D4T/3TC/NVP	Yes	AZT/3TC/NVP	stock out	Yes	46	Yes	Yes	TDF/3TC/ATV	Treatment	97	ART	Good	No			Ambulatory	48	No	Yes	Yes	No	No
234	234	156	Male	2	Fully disc	Parent	Positive	35	Female	Mother		Urban	4	Positive	Yes	WHO stage	Advanced	217		12.2		19	120		PTB	CD4+ cells	D4T/3TC/NVP	Yes	D4T/3TC/EFV	TB	Yes	84	No	No	NO	Treatment	84	ART	Good	No			Ambulatory	78	No	Yes	No	No	No
235	235	82	Female	1	Not disclo	Parent	Positive	22	Female	Mother		Urban	2	Positive	No	WHO stage	Advanced	206		13.1		18	123		NO	WHO stage	AZT/3TC/NVP	Yes	AZT/3TC/EFV	TB	No		No	No		Alive	104	ART	Good	No			Working	12	Yes	No	No	No	No
236	236	84	Female	1	Parially d	Parent	Positive	24	Female	Mother	HOUSEWIFE	Urban	2	Positive	Yes	WHO stage	Advanced	299		11.9		14.5	98		EPTB	Both	AZT/3TC/NVP	Yes	AZT/3TC/EFV	TB	No		No	No		Death	96	ART	Fair	No			Ambulatory	36	No	Yes	Yes	No	No
237	237	96	Female	3	Not disclo	Parent	Positive	25	Female	Mother		Urban	3	Positive	Yes	WHO stage	Non signif	509		13		23.5	123		TOXO	WHO stage	D4T/3TC/NVP	Yes	AZT/3TC/NVP	stock out	Yes	48	Yes	Yes	TDF/3TC/KALETRA	Death	85	ART	Fair	No			Ambulatory	1	Yes	No	No	No	No
238	238	96	Female	9	Fully disc	Gardian	Positive	52	Female	Grand pare		Urban	11	Positive	Yes	WHO stage	Non signif	605		13		22.5	123		NO	Not record	AZT/3TC/NVP	Yes	TDF/3TC/EFV	stock out	Yes	48	No	No	NO	Treatment	98	ART	Good	No			Working	12	No	Yes	No	No	No
239	239	28	Female	3	Parially d	Others	Positive	28	Male	others		Rular	5	Positive	Yes	WHO stage	Advanced	787		12.8		6.5	77		TOXO, EPTB	WHO stage	AZT/3TC/NVP	No			No		No	No		Death	25	ART	Fair	No			Ambulatory	23	Yes	No	No	No	No
240	240	24	Female	3	Parially d	Parent	Positive	27	Female	Mother		Urban	5	Positive	Yes	WHO stage	Non signif		34	13.5		9	74		NO	Not record	AZT/3TC/NVP	Yes	ABC/3TC/EFV	TB	No		No	No		Alive	103	ART	Good	No			Ambulatory	7	No	Yes	No	No	No
241	241	24	Female		Parially d	Parent	Positive	22	Female	Mother		Urban	3	Positive	Yes	WHO stage	Sever		17	13.7		8	72		PTB	Not record	AZT/3TC/EFV	No			No		No	No		Alive	46	ART	Fair	No		Approprait		46	No	Yes	No	No	No
242	242	84	Female		Fully disc	Parent	Unknown	43	Female	Mother	HOUSEWIFE	Rular	8	Unknown	Missing	WHO stage	Non signif	1509		12.9		21	123		PTB	WHO stage	AZT/3TC/EFV	No			No		No	No		Alive	18	ART	Good	No			Working	18	Yes	No	No	No	No
243	243	96	Female		Fully disc	Parent	Positive	30	Female	Mother	HOUSEWIFE	Urban	3	Positive	Yes	WHO stage	Mild	493		12.5		20	115		PTB	WHO stage	AZT/3TC/EFV	No			No		No	No		Alive	25	ART	Good	No			Working	25	No	Yes	No	No	No
244	244	96	Female		Fully disc	Parent	Unknown	33	Male	Father	FARMER	Rular	4	Positive	Yes	WHO stage	Mild	129		9		20	117		EPTB, OT	WHO stage	AZT/3TC/ABC	No			No		No	No		Death	2	ART	Fair	No			Ambulatory	2	No	Yes	Yes	No	No
245	245	60	Male		Parially d	Parent	Positive	26	Female	Mother	DAILY LABORER	Urban	4	Positive	Yes	WHO stage	Mild	418		11.3		19.5	118		PTB, URTI	WHO stage	AZT/3TC/EFV	No			No		No	No		Alive	48	ART	Good	No			Working	48	No	Yes	Yes	No	No
246	246	120	Female		Fully disc	Parent	Negative	35	Male	Father	MERCHANT	Urban	5	Positive	Yes	WHO stage	Non signif	605		15		16	112		PTB	WHO stage	AZT/3TC/NVP	No			No		No	No		Loss to fo	36	ART	Good	No			Working	36	No	No	No	No	No
247	247	28	Female		Not disclo	Parent	Positive	28	Female	Mother	HOUSEWIFE	Urban	6	Positive	Yes	WHO stage	Non signif	460		13.1		14.5	101		PTB	WHO stage	AZT/3TC/NVP	No			No		No	No		Alive	34	ART	Good	No		Approprait		34	No	Yes	Yes	No	No
248	248	96	Female		Fully disc	Parent	Unknown	57	Male	Grand pare		Urban	9	Unknown	Missing	WHO stage	Advanced	293		12.9		21	125		PTB	WHO stage	AZT/3TC/NVP	No			No		No	No		Death	23	ART	Fair	No			Ambulatory	23	No	Yes	No	No	No
249	249	132	Male		Fully disc	Parent	Positive	28	Male	Father	MERCHANT	Urban	2	Positive	Yes	WHO stage	Advanced	206		10.7		21	136		EPTB, PNEU, DIAH	WHO stage	AZT/3TC/EFV	No			No		No	No		Death	1	ART	Poor	No			Bedriden	1	Yes	No	No	No	No
250	250	132	Female		Fully disc	Parent	Unknown	42	Male	Father	FARMER	Rular	4	Unknown	Missing	WHO stage	Non signif	590		11.3		18	130		EPTB	WHO stage	AZT/3TC/EFV	No			No		No	No		Death	1	ART	Fair	No			Ambulatory	1	Yes	No	No	No	No
251	251	60	Female		Parially d	Parent	Positive	18	Female	Mother	FARMER	Rular	5	Positive	Yes	WHO stage	Advanced	275		13.3		12	106		PTB	Both	AZT/3TC/EFV	No			No		No	No		Alive	49	ART	Good	No			Working	49	No	Yes	Yes	No	No
252	252	72	Female		Fully disc	Parent	Unknown	33	Female	Mother	MERCHANT	Urban	3	Unknown	Missing	WHO stage	Advanced	236		10.8		16	115		EPTB	Both	AZT/3TC/KALETRA	No			No		No	No		Death	13	ART	Fair	No			Ambulatory	13	No	Yes	No	No	No
253	253	48	Female		Not disclo	Parent	Positive	29	Female	Mother	HOUSEWIFE	Urban	4	Positive	No	WHO stage	Sever	199		9.1		13	105		EPTB	Both	ABC/3TC/EFV	No			No		No	No		Death	1	ART	Fair	No		Delay		1	Yes	No	No	No	No
254	254	108	Female		Fully disc	Orphage	Unknown	58	Male	others		Urban	2	Unknown	Missing	WHO stage	Non signif	907		12.7		25	133		NO	WHO stage	AZT/3TC/EFV	No			No		No	No		Alive	93	ART	Good	No			Working	24	No	Yes	Yes	No	No
255	255	120	Female		Fully disc	Parent	Positive	30	Female	Mother	HOUSEWIFE	Urban	3	Positive	Yes	WHO stage	Sever	11		9.4		18	126		PTB	Both	AZT/3TC/EFV	No			No		No	No		Alive	7	ART	Good	No			Working	7	No	No	No	No	No
256	256	84	Female		Fully disc	Parent	Positive	25	Female	Mother	FARMER	Rular	5	Positive	Yes	WHO stage	Advanced	245		11.8		17	113		PTB, OT	Both	AZT/3TC/NVP	No			No		No	No		Alive	37	ART	Good	No			Working	37	No	Yes	Yes	No	No
257	257	108	Male		Fully disc	Parent	Unknown	65	Female	Grand pare	MERCHANT	Urban	3	Unknown	Missing	WHO stage	Sever	170		9.5		17	116		EPTB	Both	ABC/3TC/EFV	No			No		No	No		Death	6	ART	Good	No			Ambulatory	6	No	Yes	No	No	No
258	258	108	Female		Fully disc	Parent	Positive	40	Female	Mother		Urban	3	Positive	Yes	WHO stage	Mild	400		12		17	105		FEVER>1MONTH	Both	D4T/3TC/EFV	No			No		No	No		Loss to fo	47	ART	Good	No			Working	1	No	Yes	No	No	No
259	259	108	Male		Fully disc	Parent	Positive	33	Female	Mother	EMPLOYEE	Urban	2	Positive	Yes	WHO stage	Non signif	585		14		19	129		NO	Both	AZT/3TC/EFV	No			No		No	No		Alive	64	ART	Good	No			Working	23	No	Yes	No	No	No
260	260	20	Male		Not disclo	Parent	Positive	28	Female	Mother		Urban	6	Positive	No	WHO stage	Advanced	694		10.7		9	73		EPTB, DIAH	WHO stage	AZT/3TC/NVP	No			No		No	No		Transfer o	3	ART	Good	No		Approprait		3	No	Yes	No	No	No
261	261	96	Female		Fully disc	Parent	Positive	34	Female	Mother		Urban	5	Positive	Yes	WHO stage	Mild	371		12.6		19.5	130		NO	WHO stage	AZT/3TC/NVP	No			No		No	No		Alive	102	ART	Good	No			Working	28	No	Yes	No	No	No
262	262	19	Male		Not disclo	Parent	Positive	37	Female	Mother	HOUSEWIFE	Urban	6	Positive	Yes	WHO stage	Sever		16	11.7		9	85		PNEU	CD4+ cells	AZT/3TC/NVP	No			No		No	No		Alive	56	ART	Good	No		Approprait		43	Yes	No	No	No	No
263	263	16	Male		Not disclo	Parent	Positive	35	Female	Mother	DAILY LABORER	Rular	4	Positive	Yes	WHO stage	Mild		28	13.6		6.5	70		EPTB	WHO stage	AZT/3TC/NVP	No			No		No	No		Alive	60	ART	Good	No		Regression		60	No	Yes	No	No	No
264	264	144	Female		Fully disc	Parent	Unknown	33	Male	Father	FARMER	Urban	2	Positive	Yes	WHO stage	Non signif	904		12		23	130		PTB	WHO stage	AZT/3TC/EFV	No			No		No	No		Alive	62	ART	Good	No			Working	24	Yes	No	No	No	No
265	265	72	Female		Parially d	Parent	Positive	26	Female	Mother	HOUSEWIFE	Urban	2	Positive	Yes	WHO stage	Non signif	793		12		14	90		PTB, DIAH	WHO stage	AZT/3TC/EFV	No			No		No	No		Alive	56	ART	Good	No			Ambulatory	56	No	Yes	No	No	No
266	266	84	Female		Fully disc	Parent	Positive	30	Female	Mother	EMPLOYEE	Urban	4	Positive	Yes	WHO stage	Sever	66		12.8		18	110		PTB	CD4+ cells	AZT/3TC/NVP	No			No		No	No		Alive	32	ART	Good	No			Working	32	No	Yes	Yes	No	No
267	267	120	Male		Fully disc	Parent	Negative	27	Female	Mother	HOUSEWIFE	Urban	4	Negative	Yes	WHO stage	Sever	141		11		21	130		EPTB, DIAH	Both	AZT/3TC/EFV	No			No		No	No		Death	2	ART	Fair	No			Bedriden	2	Yes	No	No	No	No
268	268	120	Male		Fully disc	Parent	Positive	27	Female	Mother	HOUSEWIFE	Urban	4	Positive	Yes	WHO stage	Advanced	241		14.2		21	130		PTB	CD4+ cells	AZT/3TC/EFV	Yes	ABC/3TC/NVP	Side effec	No		No	No		Alive	42	ART	Good	No			Working	42	Yes	Yes	No	No	No
269	269	156	Male		Fully disc	Parent	Positive	35	Female	Mother	farmer	Urban	2	Positive	Yes	WHO stage	Sever	86		11.5		27	138		PTB	Both	ABC/3TC/NVP	No			No		No	No		Death	2	ART	Fair	No			Working	2	No	Yes	No	No	No
270	270	72	Male		Parially d	Parent	Positive	38	Female	Mother	MERCHANT	Rular	3	Positive	Yes	WHO stage	Sever	162		12.5		14	108		PTB, PNEU	Both	AZT/3TC/NVP	Yes	ABC/3TC/NVP	Side effec	No		No	No		Alive	62	ART	Good	No			Working	62	No	Yes	Yes	No	No
271	271	60	Male		Fully disc	Parent	Unknown	40	Male	Father	NGO EMPLOYEE	Urban	6	Positive	No	WHO stage	Non signif	900		14		15	102		PTB	WHO stage	AZT/3TC/EFV	No			No		No	No		Loss to fo	10	ART	Good	No			Ambulatory	10	No	Yes	No	No	No
[truncated: 42 more columns]
